# Supplementary material for: Emulsifying properties of water-soluble proteins extracted from the microalgae Chlorella sorokiniana and Phaeodactylum tricornutum
Source: Royal Society of Chemistry journal article supplement (doi:10.1039/c8fo02197j), 2019-01-01
Supplement: c8fo02197j1.pdf [file c8fo02197j1.pdf]

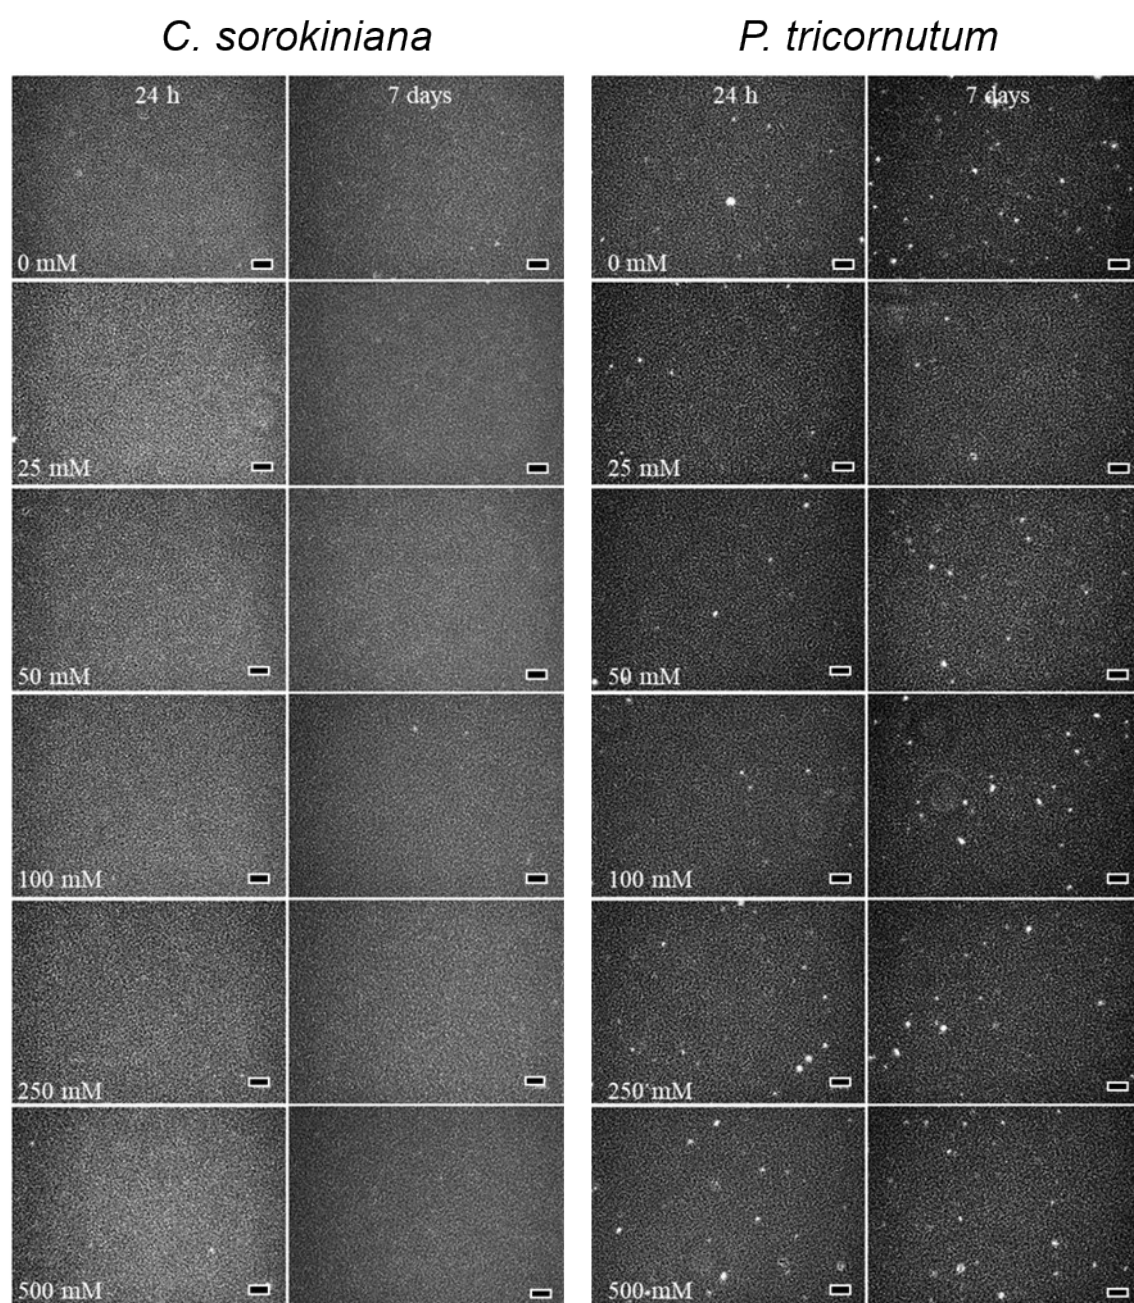

**Figure:** Microstructure of emulsions prepared with microalgae proteins after addition of NaCl, magnification: 400-fold, scale bar = 20  $\mu\text{m}$ .

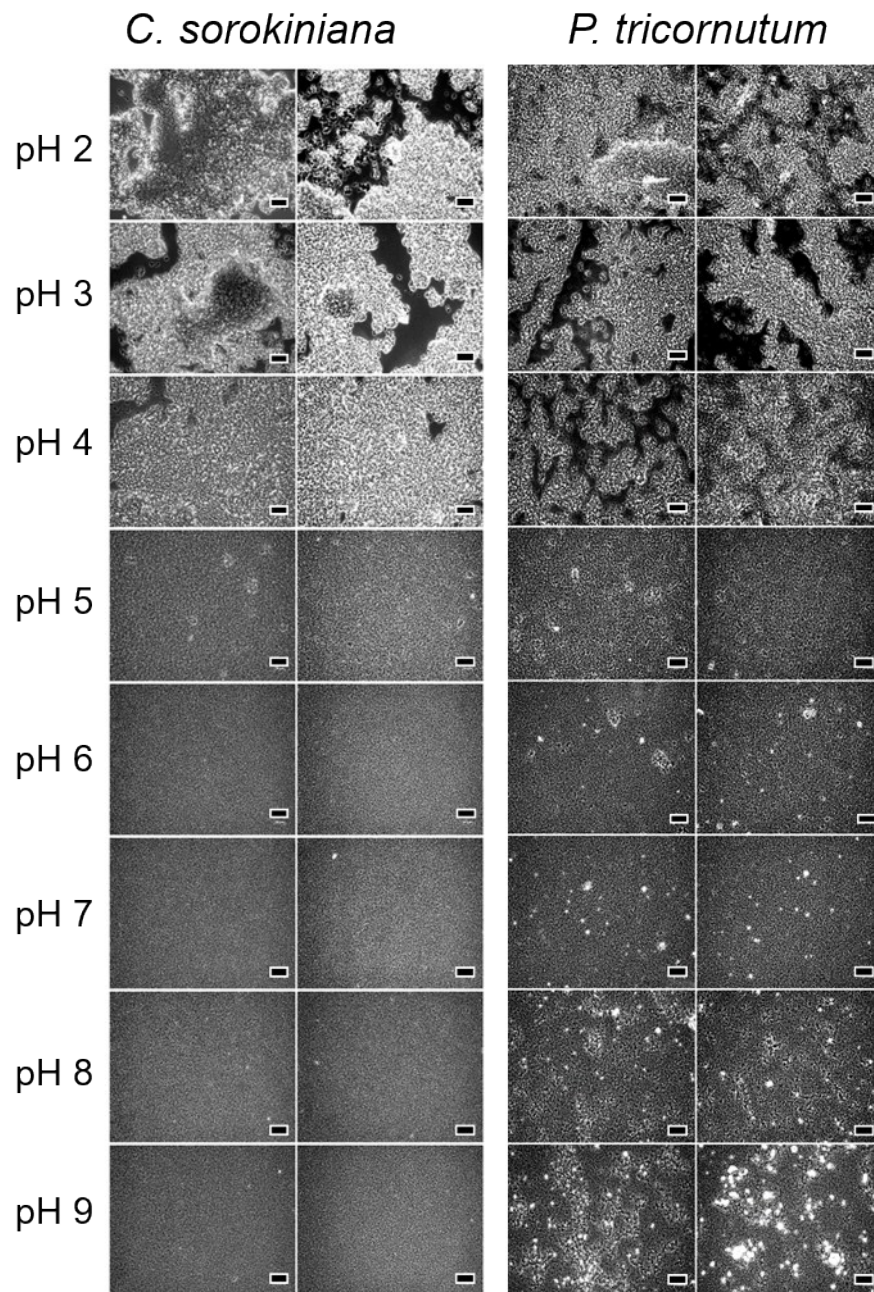

**Figure:** Microstructure of emulsions prepared with microalgae proteins after pH-adjustment to pH 2-9 after 7 days of storage, magnification: 400-fold, scale bar = 20  $\mu\text{m}$ .



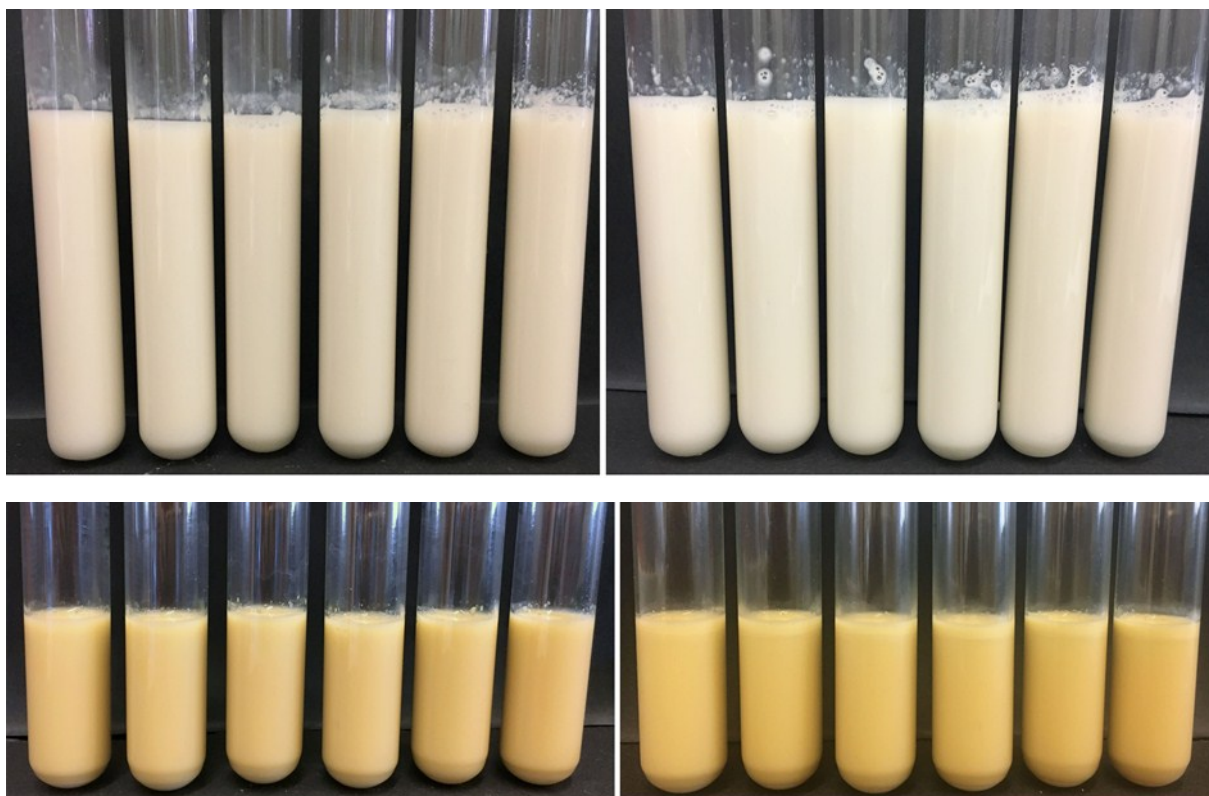

**Figure:** Visual appearance of emulsions prepared with microalgae proteins (*C. sorokiniana*: top; *P. tricornutum*: bottom) after addition of NaCl (0, 25, 50, 100, 250, 500 mM from left to right) after 24 h (left) and 7 d (right).
